# Supplementary material for: Thyroid Hormones and Moderate Exposure to Perchlorate during Pregnancy in Women in Southern California
Source: PubMed Central journal article supplement (PMC4892913; doi:10.1289/ehp.1409614), 2015-10-20
Supplement: ehp.1409614.s001.acco.pdf [file ehp.1409614.s001.acco.pdf]

**Note to readers with disabilities:** *EHP* strives to ensure that all journal content is accessible to all readers. However, some figures and Supplemental Material published in *EHP* articles may not conform to [508 standards](#) due to the complexity of the information being presented. If you need assistance accessing journal content, please contact [ehp508@niehs.nih.gov](mailto:ehp508@niehs.nih.gov). Our staff will work with you to assess and meet your accessibility needs within 3 working days.

## **Supplemental Material**

### **Thyroid Hormones and Moderate Exposure to Perchlorate during Pregnancy in Women in Southern California**

Craig Steinmaus, Michelle Pearl, Martin Kharrazi, Benjamin C. Blount, Mark D. Miller, Elizabeth N. Pearce, Liza Valentin-Blasini, Gerald DeLorenze, Andrew N. Hoofnagle, and Jane Liaw

#### **Table of Contents**

**Table S1.** Correlations between maternal urine analyte concentrations and other factors

**Table S2.** Maternal thyroid hormone concentrations by increasing quartiles of urine perchlorate and other analyte concentrations

**Table S1. Correlations between maternal urine analyte concentrations and other factors<sup>a</sup>**

| Variable                          |   | Perchlorate (µg/L) | Iodide (µg/L) | Thiocyanate (µg/L) | Nitrate (mg/L) | Creatinine (mg/dL) | Perchlorate adjusted <sup>b</sup> | Iodide adjusted <sup>b</sup> | Thiocyanate adjusted <sup>b</sup> | Nitrate adjusted <sup>b</sup> | TG antibodies (IU/mL) | TPO antibodies (IU/mL) | Urine collection time (weeks) | Serum collection time (weeks) |
|-----------------------------------|---|--------------------|---------------|--------------------|----------------|--------------------|-----------------------------------|------------------------------|-----------------------------------|-------------------------------|-----------------------|------------------------|-------------------------------|-------------------------------|
| Perchlorate (µg/L)                | R | 1.00               | 0.43          | 0.23               | 0.41           | 0.35               | 0.90                              | 0.30                         | 0.14                              | 0.26                          | -0.05                 | -0.04                  | -0.02                         | -0.02                         |
|                                   | p |                    | <0.001        | <0.001             | <0.001         | <0.001             | <0.001                            | <0.001                       | <0.001                            | <0.001                        | 0.06                  | 0.14                   | 0.38                          | 0.34                          |
|                                   | N | 1505               | 1454          | 1505               | 1501           | 1505               | 1505                              | 1454                         | 1505                              | 1501                          | 1504                  | 1504                   | 1503                          | 1505                          |
| Iodide (µg/L)                     | R | 0.43               | 1.00          | 0.27               | 0.31           | 0.41               | 0.28                              | 0.90                         | 0.18                              | 0.12                          | -0.01                 | -0.03                  | 0.00                          | -0.04                         |
|                                   | p | <0.001             |               | <0.001             | <0.001         | <0.001             | <0.001                            | <0.001                       | <0.001                            | <0.001                        | 0.79                  | 0.23                   | 0.96                          | 0.16                          |
|                                   | N | 1454               | 1454          | 1454               | 1450           | 1454               | 1454                              | 1454                         | 1454                              | 1450                          | 1453                  | 1453                   | 1452                          | 1454                          |
| Thiocyanate (µg/L)                | R | 0.23               | 0.27          | 1.00               | 0.22           | 0.26               | 0.12                              | 0.17                         | 0.96                              | 0.13                          | -0.13                 | -0.14                  | -0.16                         | -0.01                         |
|                                   | p | <0.001             | <0.001        |                    | <0.001         | <0.001             | <0.001                            | <0.001                       | <0.001                            | <0.001                        | <0.001                | <0.001                 | <0.001                        | 0.83                          |
|                                   | N | 1505               | 1454          | 1505               | 1501           | 1505               | 1505                              | 1454                         | 1505                              | 1501                          | 1504                  | 1504                   | 1503                          | 1505                          |
| Nitrate (mg/L)                    | R | 0.41               | 0.31          | 0.22               | 1.00           | 0.52               | 0.19                              | 0.10                         | 0.09                              | 0.83                          | -0.04                 | -0.07                  | -0.01                         | 0.00                          |
|                                   | p | <0.001             | <0.001        | <0.001             |                | <0.001             | <0.001                            | <0.001                       | <0.001                            | <0.001                        | 0.11                  | 0.01                   | 0.74                          | 0.86                          |
|                                   | N | 1501               | 1450          | 1501               | 1501           | 1501               | 1501                              | 1450                         | 1501                              | 1501                          | 1500                  | 1500                   | 1499                          | 1501                          |
| Creatinine (mg/dL)                | R | 0.35               | 0.41          | 0.26               | 0.52           | 1.00               | -0.06                             | 0.01                         | 0.02                              | 0.02                          | -0.01                 | -0.03                  | -0.04                         | 0.00                          |
|                                   | p | <0.001             | <0.001        | <0.001             | <0.001         |                    | 0.02                              | 0.74                         | 0.34                              | 0.38                          | 0.76                  | 0.20                   | 0.10                          | 0.85                          |
|                                   | N | 1505               | 1454          | 1505               | 1501           | 1505               | 1505                              | 1454                         | 1505                              | 1501                          | 1504                  | 1504                   | 1503                          | 1505                          |
| Perchlorate adjusted <sup>b</sup> | R | 0.90               | 0.28          | 0.12               | 0.19           | -0.06              | 1.00                              | 0.32                         | 0.14                              | 0.26                          | -0.05                 | -0.03                  | 0.00                          | -0.03                         |
|                                   | p | <0.001             | <0.001        | <0.001             | <0.001         | 0.02               |                                   | <0.001                       | <0.001                            | <0.001                        | 0.07                  | 0.23                   | 0.93                          | 0.22                          |
|                                   | N | 1505               | 1454          | 1505               | 1501           | 1505               | 1505                              | 1454                         | 1505                              | 1501                          | 1504                  | 1504                   | 1503                          | 1505                          |
| Iodide adjusted <sup>b</sup>      | R | 0.30               | 0.90          | 0.17               | 0.10           | 0.01               | 0.32                              | 1.00                         | 0.17                              | 0.12                          | -0.01                 | -0.02                  | 0.02                          | -0.04                         |
|                                   | p | <0.001             | <0.001        | <0.001             | <0.001         | 0.74               | <0.001                            |                              | <0.001                            | <0.001                        | 0.82                  | 0.51                   | 0.48                          | 0.15                          |
|                                   | N | 1454               | 1454          | 1454               | 1450           | 1454               | 1454                              | 1454                         | 1454                              | 1450                          | 1453                  | 1453                   | 1452                          | 1454                          |
| Thiocyanate adjusted <sup>b</sup> | R | 0.14               | 0.18          | 0.96               | 0.09           | 0.02               | 0.14                              | 0.17                         | 1.00                              | 0.12                          | -0.14                 | -0.13                  | -0.16                         | -0.01                         |
|                                   | p | <0.001             | <0.001        | <0.001             | <0.001         | 0.34               | <0.001                            | <0.001                       |                                   | <0.001                        | <0.001                | <0.001                 | <0.001                        | 0.77                          |
|                                   | N | 1505               | 1454          | 1505               | 1501           | 1505               | 1505                              | 1454                         | 1505                              | 1501                          | 1504                  | 1504                   | 1503                          | 1505                          |
| Nitrate adjusted <sup>b</sup>     | R | 0.26               | 0.12          | 0.13               | 0.83           | 0.02               | 0.26                              | 0.12                         | 0.12                              | 1.00                          | -0.04                 | -0.05                  | 0.03                          | 0.00                          |
|                                   | p | <0.001             | <0.001        | <0.001             | <0.001         | 0.38               | <0.001                            | <0.001                       | <0.001                            |                               | 0.13                  | 0.06                   | 0.32                          | 0.90                          |
|                                   | N | 1501               | 1450          | 1501               | 1501           | 1501               | 1501                              | 1450                         | 1501                              | 1501                          | 1500                  | 1500                   | 1499                          | 1501                          |
| TG antibodies (IU/mL)             | R | -0.05              | -0.01         | -0.13              | -0.04          | -0.01              | -0.05                             | -0.01                        | -0.14                             | -0.04                         | 1.00                  | 0.29                   | 0.00                          | 0.00                          |
|                                   | p | 0.06               | 0.79          | <0.001             | 0.11           | 0.76               | 0.07                              | 0.82                         | <0.001                            | 0.13                          |                       | <0.001                 | 0.90                          | 0.90                          |
|                                   | N | 1504               | 1453          | 1504               | 1500           | 1504               | 1504                              | 1453                         | 1504                              | 1500                          | 1504                  | 1503                   | 1502                          | 1504                          |
| TPO antibodies (IU/mL)            | R | -0.04              | -0.03         | -0.14              | -0.07          | -0.03              | -0.03                             | -0.02                        | -0.13                             | -0.05                         | 0.29                  | 1.00                   | -0.02                         | -0.06                         |
|                                   | p | 0.14               | 0.23          | <0.001             | 0.01           | 0.20               | 0.23                              | 0.51                         | <0.001                            | 0.06                          | <0.001                |                        | 0.41                          | 0.03                          |
|                                   | N | 1504               | 1453          | 1504               | 1500           | 1504               | 1504                              | 1453                         | 1504                              | 1500                          | 1503                  | 1504                   | 1502                          | 1504                          |

|              |   |       |       |        |       |       |       |       |        |      |      |       |        |        |
|--------------|---|-------|-------|--------|-------|-------|-------|-------|--------|------|------|-------|--------|--------|
| Urine        | R | -0.02 | 0.00  | -0.16  | -0.01 | -0.04 | 0.00  | 0.02  | -0.16  | 0.03 | 0.00 | -0.02 | 1.00   | 0.12   |
| collection   | p | 0.38  | 0.96  | <0.001 | 0.74  | 0.10  | 0.93  | 0.48  | <0.001 | 0.32 | 0.90 | 0.41  |        | <0.001 |
| time (weeks) | N | 1503  | 1452  | 1503   | 1499  | 1503  | 1503  | 1452  | 1503   | 1499 | 1502 | 1502  | 1503   | 1503   |
| Serum        | R | -0.02 | -0.04 | -0.01  | 0.00  | 0.00  | -0.03 | -0.04 | -0.01  | 0.00 | 0.00 | -0.06 | 0.12   | 1.00   |
| collection   | p | 0.34  | 0.16  | 0.83   | 0.86  | 0.85  | 0.22  | 0.15  | 0.77   | 0.90 | 0.90 | 0.03  | <0.001 |        |
| time (weeks) | N | 1505  | 1454  | 1505   | 1501  | 1505  | 1505  | 1454  | 1505   | 1501 | 1504 | 1504  | 1503   | 1505   |

Abbreviations: N, number of subjects; p, p-value; R, Spearman correlation coefficients, TG, thyroglobulin; TPO, thyroperoxidase

<sup>a</sup> Only includes subjects with urinary creatinine concentrations between the 10<sup>th</sup> and 90<sup>th</sup> percentiles (i.e., 41-233 mg/dL). Results were similar in analyses involving all creatinine concentrations (data not shown)

<sup>b</sup> Creatinine adjusted analyte concentrations using residuals method.

**Table S2. Maternal thyroid hormone concentrations by increasing quartiles of urine perchlorate and other analyte concentrations<sup>a</sup>**

|                            | T4 (µg/dL) |                            | ft4 (ng/dL)                | TSH (µU/mL)                |
|----------------------------|------------|----------------------------|----------------------------|----------------------------|
|                            | N          | Mean <sup>b</sup> (95% CI) | Mean <sup>b</sup> (95% CI) | Mean <sup>b</sup> (95% CI) |
| Perchlorate (µg/L)         |            |                            |                            |                            |
| <4.5                       | 365        | 12.58 (12.38, 12.79)       | 0.89 (0.86, 0.91)          | 1.31 (1.21, 1.40)          |
| 4.5-6.8                    | 370        | 12.29 (12.09, 12.48)       | 0.86 (0.84, 0.88)          | 1.37 (1.29, 1.46)          |
| 6.9-10.1                   | 368        | 12.24 (12.04, 12.43)       | 0.84 (0.82, 0.87)          | 1.36 (1.27, 1.45)          |
| >10.1                      | 373        | 12.05 (11.85-12.25)        | 0.84 (0.82, 0.86)          | 1.42 (1.33, 1.51)          |
| Trend p-value <sup>c</sup> |            | 0.008                      | 0.005                      | 0.15                       |
| Iodide (µg/L)              |            |                            |                            |                            |
| <90.6                      | 354        | 12.36 (12.15, 12.57)       | 0.87 (0.84, 0.89)          | 1.30 (1.21, 1.40)          |
| 90.6-160.0                 | 352        | 12.29 (12.09, 12.49)       | 0.85 (0.83, 0.87)          | 1.39 (1.30, 1.48)          |
| 160.1-277.0                | 359        | 12.37 (12.17, 12.57)       | 0.86 (0.84, 0.88)          | 1.37 (1.28, 1.46)          |
| >277.0                     | 360        | 12.21 (12.01, 12.41)       | 0.86 (0.84, 0.88)          | 1.40 (1.31, 1.49)          |
| Trend p-value <sup>c</sup> |            | 0.44                       | 0.86                       | 0.26                       |
| Thiocyanate (µg/L)         |            |                            |                            |                            |
| <519                       | 360        | 12.61 (12.41, 12.82)       | 0.86 (0.84, 0.88)          | 1.25 (1.15, 1.34)          |
| 519-932                    | 371        | 12.31 (12.12, 12.51)       | 0.87 (0.85, 0.89)          | 1.41 (1.32, 1.50)          |
| 933-1620                   | 370        | 12.18 (11.99, 12.38)       | 0.85 (0.83, 0.87)          | 1.33 (1.24, 1.42)          |
| >1620                      | 375        | 12.05 (11.85, 12.26)       | 0.86 (0.83, 0.88)          | 1.46 (1.37, 1.56)          |
| Trend p-value <sup>c</sup> |            | <0.001                     | 0.59                       | 0.01                       |
| Nitrate (mg/L)             |            |                            |                            |                            |
| <36.3                      | 366        | 12.50 (12.28, 12.72)       | 0.87 (0.84, 0.89)          | 1.42 (1.32, 1.52)          |
| 36.3-55.5                  | 370        | 12.29 (12.09, 12.48)       | 0.84 (0.82, 0.86)          | 1.38 (1.29, 1.47)          |
| 55.6-81.9                  | 367        | 12.20 (12.00, 12.40)       | 0.88 (0.86, 0.90)          | 1.36 (1.27, 1.45)          |
| >81.9                      | 369        | 12.16 (11.95, 12.36)       | 0.85 (0.83, 0.87)          | 1.31 (1.21, 1.40)          |
| Trend p-value <sup>c</sup> |            | 0.04                       | 0.75                       | 0.13                       |

Abbreviations: CI, confidence interval; ft4, free thyroxine; N, number of subjects; T4, total thyroxine; TSH, thyroid stimulating hormone

<sup>a</sup> Only includes subjects with urinary creatinine concentrations between the 10<sup>th</sup> and 90<sup>th</sup> percentiles in all subjects (i.e., 41-233 mg/dL)

<sup>b</sup> Adjusted for urinary creatinine, urinary thiocyanate, maternal age, maternal education, ethnicity (Hispanics vs. non-Hispanics), and gestational age at serum collection

<sup>c</sup> Trend test p-values to assess linear dose-response relations were derived by using proc GLM to model an ordinal variable representing quartiles of exposure to perchlorate, iodide, thiocyanate, or nitrate, with each participant assigned the mean value of their respective quartile
